# Supplementary material for: The renin-angiotensin system and right ventricular structure and function: The MESA-Right Ventricle Study
Source: PubMed Central journal article supplement — Pulm Circ. 2012 Jul-Sep;2(3):379–86. doi: 10.4103/2045-8932.101657 (PMC3487307; doi:10.4103/2045-8932.101657), 2012
Supplement: PC-2-379_s1.pdf [file PC-2-379_s1.pdf]

**Table E1. Characteristics of the study sample by race/ethnicity**

|                                    | Caucasians   | African Americans | Hispanics     | Chinese Americans |
|------------------------------------|--------------|-------------------|---------------|-------------------|
| <b>Number</b>                      | 1591         | 1012              | 877           | 511               |
| <b>Demographics</b>                |              |                   |               |                   |
| Age, years                         | 62.1 ± 10.2  | 61.2 ± 9.9        | 60.5 ± 10.1   | 61.2 ± 10.3       |
| Male gender, %                     | 46.8         | 46.0              | 51.1          | 48.3              |
| Education, %                       |              |                   |               |                   |
| < High school                      | 4.7          | 10.5              | 41.6          | 21.3              |
| High school                        | 16.3         | 19.2              | 21.8          | 16.1              |
| < College, (> high school)         | 27.7         | 35.4              | 25.5          | 20.7              |
| ≥ College                          | 51.3         | 34.9              | 11.1          | 41.9              |
| <b>Anthropometrics</b>             |              |                   |               |                   |
| Height, cm                         | 168.7 ± 9.7  | 168.5 ± 9.6       | 162.5 ± 9.0   | 161.7 ± 8.7       |
| Weight, kg                         | 78.4 ± 16.1  | 83.6 ± 15.9       | 76.7 ± 13.4   | 62.4 ± 10.9       |
| Body mass index, kg/m <sup>2</sup> | 27.4 ± 4.7   | 29.4 ± 5.1        | 28.9 ± 4.5    | 23.8 ± 3.2        |
| <b>Smoking status</b>              |              |                   |               |                   |
| Never-smoker, %                    | 45.5         | 47.6              | 55.2          | 76.5              |
| Former smoker, %                   | 43.4         | 34.5              | 30.9          | 19.4              |
| Current smoker, %                  | 11.1         | 17.9              | 13.9          | 4.1               |
| Pack years, among ever-smokers     | 14.7 ± 29.2  | 10.9 ± 18.2       | 7.7 ± 16.5    | 4.4 ± 13.4        |
| <b>Disease Prevalence</b>          |              |                   |               |                   |
| Diabetes mellitus, %               |              |                   |               |                   |
| Normal                             | 84.1         | 71.0              | 68.7          | 71.2              |
| Impaired fasting glucose           | 10.2         | 12.5              | 15.3          | 17.8              |
| Untreated diabetes                 | 1.5          | 3.7               | 3.1           | 2.2               |
| Treated diabetes                   | 4.2          | 12.8              | 12.9          | 8.8               |
| Total cholesterol, mg/dl           | 195.7 ± 35.0 | 190.4 ± 35.7      | 198.8 ± 36.3  | 191.6 ± 30.3      |
| High-density lipoprotein, mg/dl    | 52.2 ± 15.8  | 53.0 ± 15.8       | 47.8 ± 13.3   | 49.6 ± 12.6       |
| Triglycerides, mg/dl               | 132.7 ± 81.7 | 102.1 ± 55.6      | 156.0 ± 110.5 | 141.6 ± 83.0      |
| Statin use, %                      | 16.09        | 13.93             | 12.31         | 13.5              |
| Hypertension, %                    | 36.46        | 54.15             | 38.65         | 34.4              |
| Systolic blood pressure, mm Hg     | 122.9 ± 20.4 | 129.9 ± 21.4      | 125.8 ± 21.1  | 122.1 ± 20.3      |
| Diastolic blood pressure, mmHg     | 70.2 ± 10.0  | 74.7 ± 10.1       | 71.8 ± 9.8    | 71.4 ± 10.1       |
| Antihypertensive use, n (%)        | 501 (31.5)   | 453 (44.8)        | 259 (29.5)    | 140 (27.4)        |
| AIAB use, n (%)                    | 214 (13.5)   | 185 (18.3)        | 124 (14.1)    | 57 (11.2)         |

|                    |              |              |              |              |
|--------------------|--------------|--------------|--------------|--------------|
| ACEI use, n (%)    | 164 (10.3)   | 151 (14.8)   | 103 (11.7)   | 28 (5.5)     |
| ARB use, n (%)     | 51 (3.2)     | 35 (3.5)     | 22 (2.4)     | 29 (5.7)     |
| Creatinine         | 1.0 ± 0.2    | 1.0 ± 0.3    | 0.9 ± 0.3    | 0.9 ± 0.2    |
| Urine albumin      | 1.5 ± 7.7    | 3.0 ± 17.8   | 3.6 ± 18.9   | 2.5 ± 9.6    |
| <b>RV measures</b> |              |              |              |              |
| RVEF, %            | 70.4 ± 6.5   | 69.8 ± 6.7   | 70.5 ± 6.3   | 71.7 ± 6.0   |
| RVSV, mL           | 88.1 ± 21.6  | 88.6 ± 20.3  | 87.8 ± 20.1  | 77.3 ± 16.8  |
| RV mass, g         | 21.4 ± 4.7   | 21.5 ± 4.3   | 21.1 ± 4.1   | 18.9 ± 3.7   |
| RVEDV, mL          | 126.1 ± 32.7 | 127.7 ± 30.0 | 125.2 ± 29.5 | 108.6 ± 25.1 |
| RVESV, mL          | 38.0 ± 15.0  | 39.1 ± 14.4  | 37.4 ± 13.5  | 31.2 ± 11.2  |

Data shown as mean ± standard deviation or %. AIAB=angiotensin-converting enzyme inhibitors and angiotensin II receptor blockers; ACEI=angiotensin-converting enzyme inhibitors; ARB=angiotensin II receptor blockers; RV=right ventricle; RVEF=right ventricular ejection fraction; RVSV=right ventricular stroke volume; RVEDV=right ventricular end-diastolic volume; RVESV= right ventricular end-systolic volume.
