# Supplementary material for: The renin-angiotensin system and right ventricular structure and function: The MESA-Right Ventricle Study
Source: PubMed Central journal article supplement — Pulm Circ. 2012 Jul-Sep;2(3):379–86. doi: 10.4103/2045-8932.101657 (PMC3487307; doi:10.4103/2045-8932.101657), 2012
Supplement: PC-2-379_s2.pdf [file PC-2-379_s2.pdf]

**Table E2. Characteristics of the study sample (Caucasians and African Americans only), by AIAB use**

|                                    | Caucasians   |                | African Americans |                |
|------------------------------------|--------------|----------------|-------------------|----------------|
|                                    | AIAB Users   | AIAB Non-users | AIAB Users        | AIAB Non-users |
| <b>Number</b>                      | 214          | 1377           | 185               | 827            |
| <b>Demographics</b>                |              |                |                   |                |
| Age, years                         | 65.4 ± 9.6   | 61.5 ± 10.2    | 64.8 ± 8.8        | 60.4 ± 10.0    |
| Male gender, %                     | 56.1         | 45.4           | 45.4              | 46.1           |
| Education, %                       |              |                |                   |                |
| < High school                      | 4.7          | 4.7            | 10.8              | 10.5           |
| High school                        | 15.9         | 16.4           | 24.9              | 17.9           |
| < College, (> high school)         | 32.7         | 26.9           | 36.7              | 35.1           |
| ≥ College                          | 46.7         | 52.0           | 27.6              | 36.5           |
| <b>Anthropometrics</b>             |              |                |                   |                |
| Height, cm                         | 168.6 ± 9.1  | 168.7 ± 9.8    | 168.0 ± 9.1       | 168.6 ± 9.8    |
| Weight, kg                         | 82.5 ± 15.9  | 77.7 ± 16.0    | 86.1 ± 15.7       | 83.0 ± 15.9    |
| Body mass index, kg/m <sup>2</sup> | 28.9 ± 4.6   | 27.2 ± 4.7     | 30.4 ± 5.1        | 29.2 ± 5.1     |
| <b>Smoking status</b>              |              |                |                   |                |
| Never-smoker, %                    | 51.9         | 44.5           | 46.5              | 47.9           |
| Former smoker, %                   | 42.0         | 43.7           | 37.3              | 33.8           |
| Current smoker, %                  | 6.1          | 11.8           | 16.2              | 18.3           |
| Pack years, among ever-smokers     | 15.3 ± 32.0  | 14.6 ± 28.8    | 12.5 ± 18.2       | 10.6 ± 18.1    |
| <b>Disease Prevalence</b>          |              |                |                   |                |
| Diabetes mellitus, %               |              |                |                   |                |
| Normal                             | 64.5         | 87.1           | 43.8              | 77.0           |
| Impaired fasting glucose           | 17.8         | 9.1            | 14.6              | 12.1           |
| Untreated diabetes                 | 4.2          | 1.1            | 1.6               | 4.1            |
| Treated diabetes                   | 13.5         | 2.7            | 40.0              | 6.8            |
| Total cholesterol, mg/dl           | 187.6 ± 38.9 | 197.0 ± 34.2   | 185.1 ± 38.6      | 191.5 ± 34.9   |
| High-density lipoprotein, mg/dl    | 48.1 ± 13.4  | 52.9 ± 16.1    | 51.4 ± 13.4       | 53.3 ± 16.3    |
| Triglycerides, mg/dl               | 160.6 ± 97.9 | 128.3 ± 78.0   | 106.7 ± 59.4      | 100.9 ± 54.7   |
| Statin use, %                      | 30.8         | 13.8           | 25.4              | 11.4           |
| Hypertension, %                    | 97.2         | 27.0           | 97.8              | 44.4           |
| Systolic blood pressure, mm Hg     | 132.1 ± 22.9 | 121.4 ± 19.6   | 140.2 ± 24.1      | 127.6 ± 20.0   |
| Diastolic blood pressure, mmHg     | 72.2 ± 10.3  | 69.8 ± 9.9     | 76.2 ± 11.3       | 74.4 ± 9.7     |
| Antihypertensive use, n (%)        | 100.0        | 20.8           | 100.0             | 32.4           |

|                                 |            |           |            |            |
|---------------------------------|------------|-----------|------------|------------|
| Beta-blockers, n (%)            | 18.2       | 7.6       | 12.4       | 9.1        |
| Calcium channel blockers, n (%) | 16.4       | 5.8       | 31.4       | 16.2       |
| Creatinine                      | 1.0 ± 0.2  | 0.9 ± 0.2 | 1.0 ± 0.3  | 1.0 ± 0.2  |
| Urine albumin                   | 4.1 ± 18.6 | 1.0 ± 3.6 | 4.9 ± 13.9 | 2.5 ± 18.6 |

---

Data shown as mean ± standard deviation or %. AIAB=angiotensin-converting enzyme inhibitors and angiotensin II receptor blockers.
