# Supplementary material for: The renin-angiotensin system and right ventricular structure and function: The MESA-Right Ventricle Study
Source: PubMed Central journal article supplement — Pulm Circ. 2012 Jul-Sep;2(3):379–86. doi: 10.4103/2045-8932.101657 (PMC3487307; doi:10.4103/2045-8932.101657), 2012
Supplement: PC-2-379_s3.pdf [file PC-2-379_s3.pdf]

**Table E3. Associations between AIAB use and RV measures in fully adjusted models among participants with available spirometry, by race/ethnicity**

|            |                        | Caucasians        |         | African Americans  |         | Hispanics         |         | Chinese Americans |         |
|------------|------------------------|-------------------|---------|--------------------|---------|-------------------|---------|-------------------|---------|
| Number     |                        | 962               |         | 661                |         | 597               |         | 481               |         |
| RV measure | Model                  | Beta (95% CI)     | P value | Beta (95% CI)      | P value | Beta (95% CI)     | P value | Beta (95% CI)     | P value |
| RVEF, %    | Adjusted*              | -0.1 (-1.4 – 1.2) | 0.86    | 0.5 (-0.9 – 1.9)   | 0.51    | -0.9 (-2.6 – 0.7) | 0.26    | -0.6 (-2.4 – 1.3) | 0.55    |
|            | Adjusted + spirometry† | -0.1 (-1.4 – 1.2) | 0.88    | 0.5 (-0.9 – 1.9)   | 0.49    | -0.9 (-2.5 – 0.8) | 0.29    | -0.7 (-2.5 – 1.1) | 0.45    |
| RVSV, mL   | Adjusted               | 1.4 (-2.4 – 5.3)  | 0.47    | -2.3 (-6.1 – 1.6)  | 0.26    | 0.1 (-4.7 – 4.8)  | 0.98    | -0.0 (-4.4 – 4.4) | 0.99    |
|            | Adjusted + spirometry  | 1.7 (-2.2 – 5.5)  | 0.40    | -2.1 (-6.0 – 1.8)  | 0.28    | 0.1 (-4.7 – 4.9)  | 0.97    | -0.2 (-4.6 – 4.3) | 0.94    |
| RV mass, g | Adjusted               | 0.1 (-0.7 – 0.9)  | 0.80    | -0.6 (-1.4 – 0.1)  | 0.08    | -0.4 (-1.2 – 0.5) | 0.40    | -0.3 (-1.2 – 0.6) | 0.53    |
|            | Adjusted + spirometry  | 0.1 (-0.6 – 0.9)  | 0.72    | -0.7 (-1.4 – 0.1)  | 0.08    | -0.4 (-1.2 – 0.5) | 0.42    | -0.3 (-1.2 – 0.6) | 0.54    |
| RVEDV, mL  | Adjusted               | 1.7 (-2.3 – 5.6)  | 0.41    | -4.3 (-8.1 – -0.5) | 0.03    | 0.4 (-4.2 – 4.9)  | 0.88    | 0.7 (-4.0 – 5.4)  | 0.77    |
|            | Adjusted + spirometry  | 1.7 (-2.2 – 5.6)  | 0.39    | -4.2 (-8.1 – -0.4) | 0.03    | 0.4 (-4.2 – 5.0)  | 0.86    | 0.6 (-4.1 – 5.3)  | 0.81    |
| RVESV, mL  | Adjusted               | 0.7 (-1.8 – 3.1)  | 0.58    | -2.0 (-4.5 – 0.6)  | 0.13    | 0.9 (-1.8 – 3.7)  | 0.51    | 1.0 (-1.8 – 3.7)  | 0.49    |
|            | Adjusted + spirometry  | 0.7 (-1.7 – 3.2)  | 0.55    | -1.9 (-4.5 – 0.6)  | 0.14    | 0.8 (-1.9 – 3.6)  | 0.55    | 1.1 (-1.7 – 3.8)  | 0.45    |

\*Adjusted for age, gender, height, weight, use of antihypertensive medications, systolic and diastolic blood pressure, creatinine, urine albumin, smoking (status and pack-years), diabetes mellitus, impaired glucose tolerance, cholesterol, triglycerides, statin use, level of education, and respective LV parameter.

†FEV1, FVC, FEV1/FVC ratio. AIAB=angiotensin-converting enzyme inhibitors and angiotensin II receptor blockers; RV=right ventricle; RVEF=right ventricular ejection fraction; RVSV=right ventricular stroke volume; RVEDV=right ventricular end-diastolic volume; RVESV= right ventricular end-systolic volume; FEV1= forced expiratory volume in one second; FVC=forced vital capacity.
